# Supplementary material for: Establishment of a Cell Suspension Culture of Eysenhardtia platycarpa: Phytochemical Screening of extracts and Evaluation of Antifungal Activity.
Source: Preprints.org preprint supplement (doi:10.20944/preprints202011.0167.v1), 2020-11-03
Supplement: Supplementary file 1 [file Suplementary Material.docx]

Article

Establishment of a Cell Suspension Culture of *Eysenhardtia platycarpa*: Phytochemical Screening of extracts and Evaluation of Antifungal Activity.

**Supplementary material** Figure S1: GC-MS chromatogram of the fatty hexane extract of sapwood, Figure S2: GC-MS chromatogram of the fatty hexane extract of heartwood, Figure S3: GC-MS chromatogram of the fatty hexane extract of leaf, Figure S4: GC-MS chromatogram of the fatty hexane extract of cell suspension cultures, Figure S5: GC-MS chromatogram of the defatted hexane extract of sapwood, Figure S6: GC-MS chromatogram of the defatted hexane extract of heartwood, Figure S7: GC-MS chromatogram of the defatted hexane extract of leaf, Figure S8: GC-MS chromatogram of the defatted hexane extract of cell suspension culture, Figure S9: GC-MS chromatogram of the dichloromethane sapwood extract, Figure 10: GC-MS chromatogram of the dichloromethane heartwood extract, Figure S11: GC-MS chromatogram of the dichloromethane leaf extract, Figure S12: GC-MS chromatogram of the dichloromethane cell suspension culture extract, Figure S13: GC-MS chromatogram of the methanolic sapwood extract, Figure S14: GC-MS chromatogram of the methanolic heartwood extract, Figure S15: GC-MS chromatogram of the methanolic leaf extract, Figure S16: GC-MS chromatogram of the methanolic cell suspension cultures extract, Figure S17: Mass spectrum and structure of nonanedioic acid (azelaic acid), Figure S18: Mass spectrum and structure of hexadecanoic acid, Figure S19: Mass spectrum and structure of stigmasta-3,5-dien-7-one, Figure S20: Mass spectrum and structure of octacosanol, Figure S21: Mass spectrum and structure of *β*-amyrin, Figure S22: Mass spectrum and structure of octadecanoic acid, Figure S23: Mass spectrum and structure of campesterol, Figure S24: Mass spectrum and structure of stigmasterol, Figure S25: Mass spectrum and structure of *β*-sitosterol, Figure S26: Mass spectrum and structure of 3-phenylpropanoic acid (Benzenepropanoic acid), Figure S27: Mass spectrum and structure of 9,12,15-octadecatrienoic acid, (Z,Z,Z)-(α-Linolenic acid), Figure S28: Mass spectrum and structure of 9,12-octadecadienoic acid (Z,Z), Figure S29: Mass spectrum of D-pinitol, compared with [51].


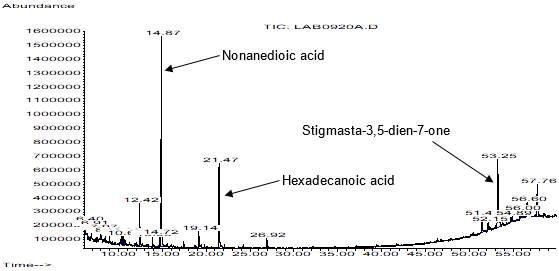


**Figure S1.** GC-MS chromatogram of the fatty hexane extract of sapwood


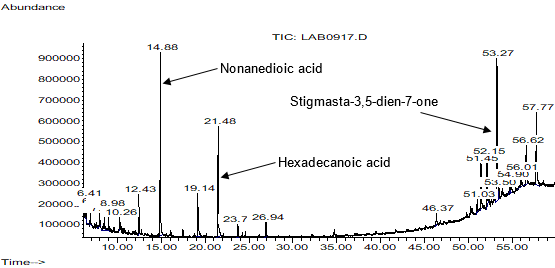


**Figure S2.** GC-MS chromatogram of the fatty hexane extract of heartwood.


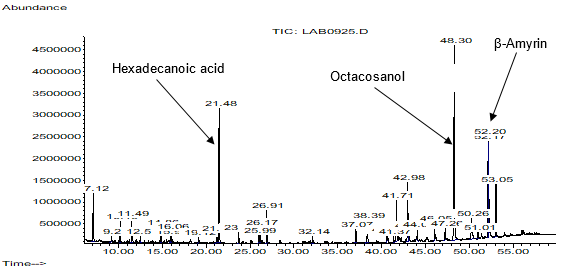


**Figure S3.** GC-MS chromatogram of the fatty hexane extract of leaf.


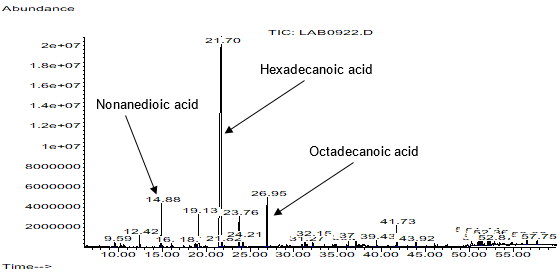


**Figure S4.** GC-MS chromatogram of the fatty hexane extract of cell suspension cultures.


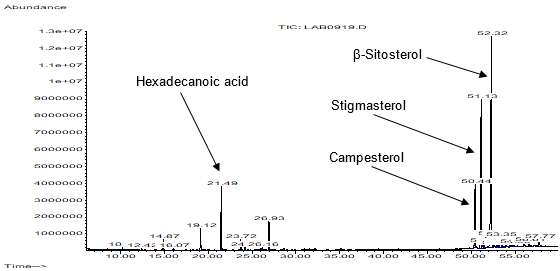


**Figure S5.** GC-MS chromatogram of the defatted hexane extract of sapwood.


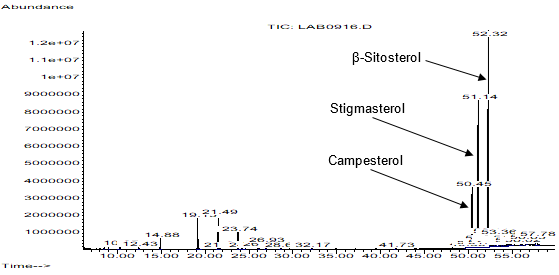


**Figure S6.** GC-MS chromatogram of the defatted hexane extract of heartwood.


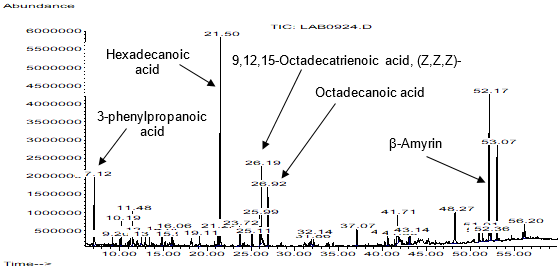


**Figure S7.** GC-MS chromatogram of the defatted hexane extract of leaf.


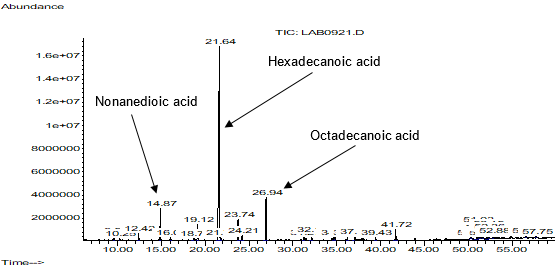


**Figure S8.** GC-MS chromatogram of the defatted hexane extract of cell suspension culture.


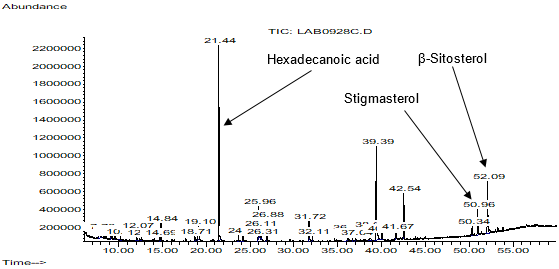


**Figure S9.** GC-MS chromatogram of the dichloromethane sapwood extract.


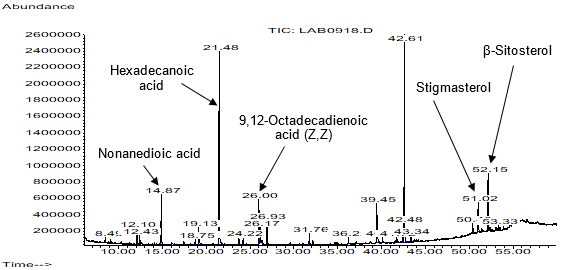


**Figure 10.** GC-MS chromatogram of the dichloromethane heartwood extract.


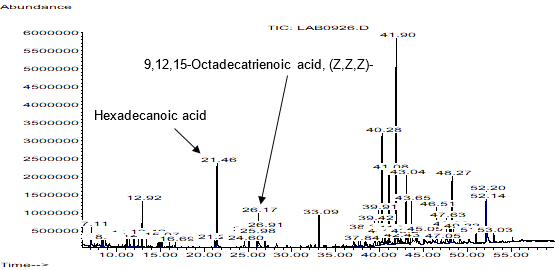


**Figure S11.** GC-MS chromatogram of the dichloromethane leaf extract.


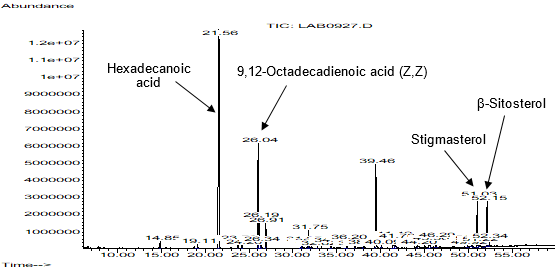


**Figure S12.** GC-MS chromatogram of the dichloromethane cell suspension culture extract.


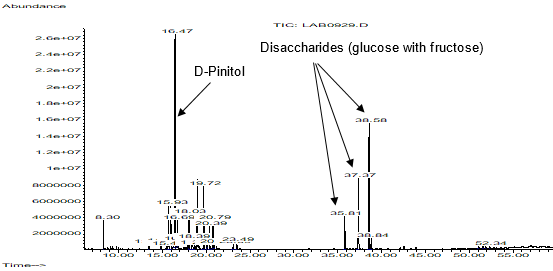


**Figure S13.** GC-MS chromatogram of the methanolic sapwood extract.


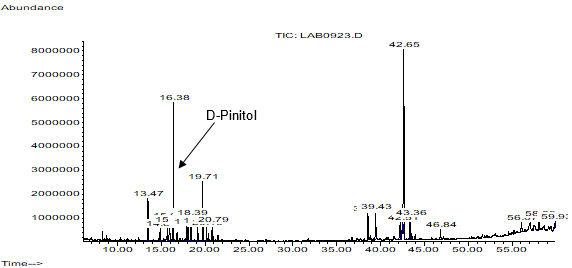


**Figure S14.** GC-MS chromatogram of the methanolic heartwood extract.


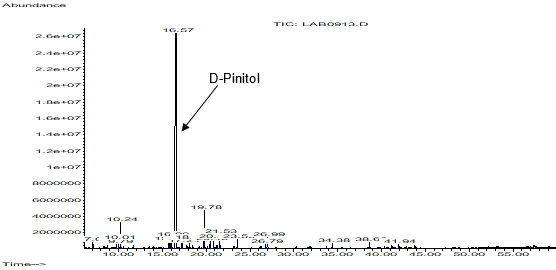


**Figure S15.** GC-MS chromatogram of the methanolic leaf extract.


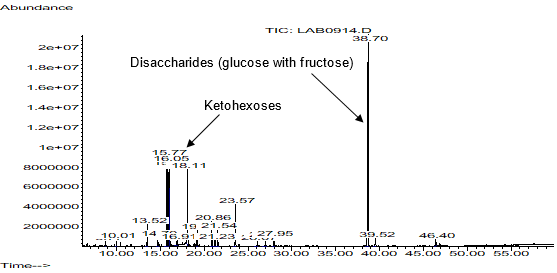


**Figure S16.** GC-MS chromatogram of the methanolic cell suspension cultures extract.


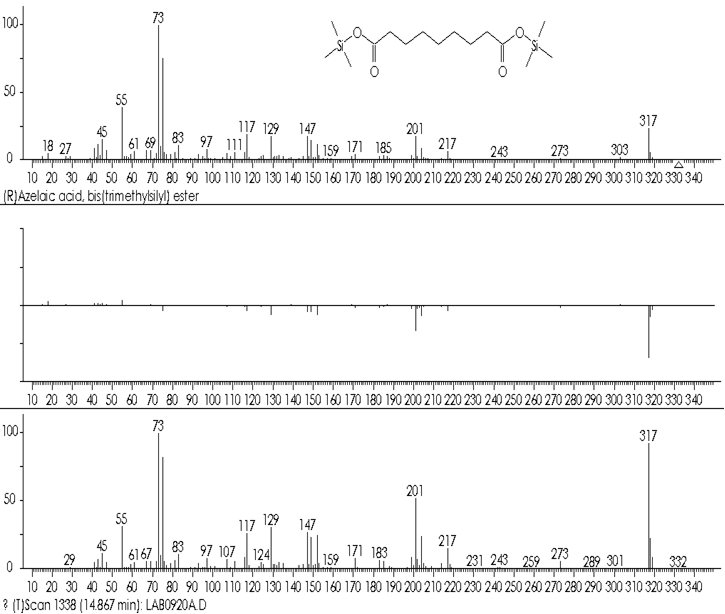


**Figure S17.** Mass spectrum and structure of nonanedioic acid (azelaic acid).


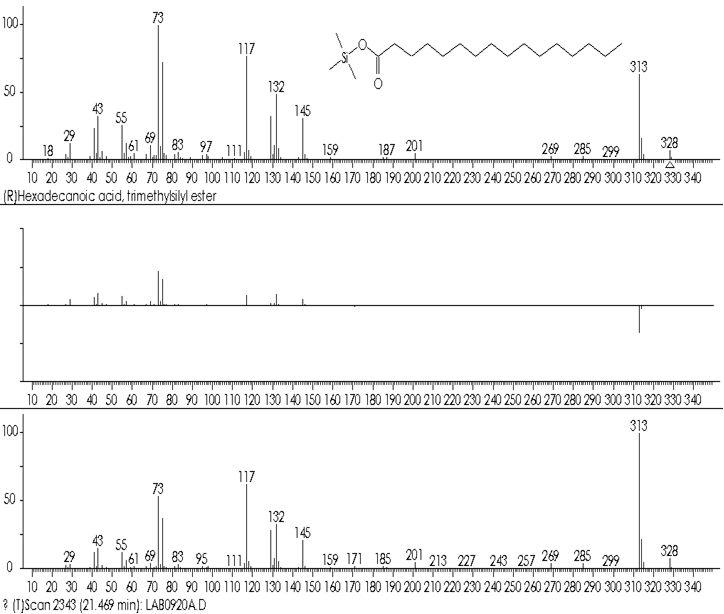


**Figure S18.** Mass spectrum and structure of hexadecanoic acid.


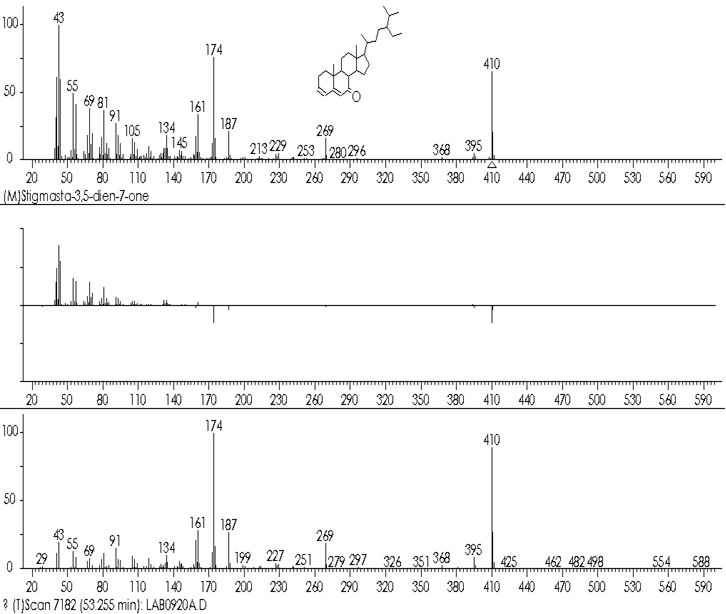


**Figure S19.** Mass spectrum and structure of stigmasta-3,5-dien-7-one.


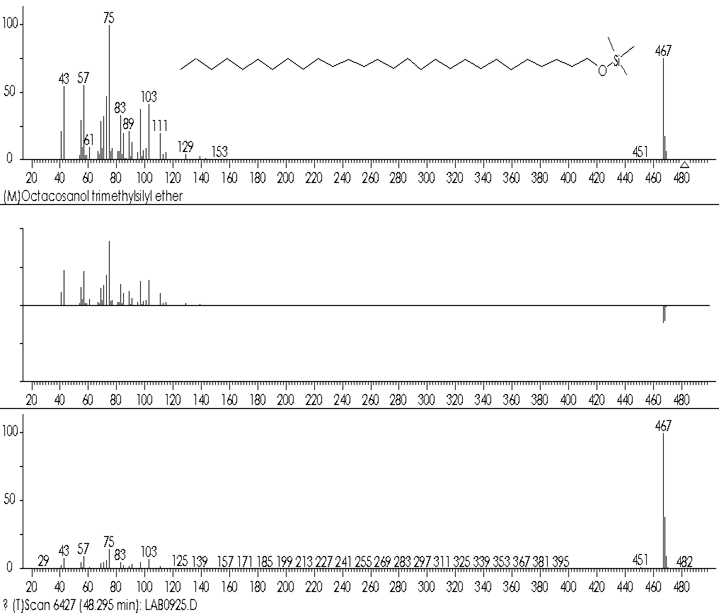


**Figure S20.** Mass spectrum and structure of octacosanol.


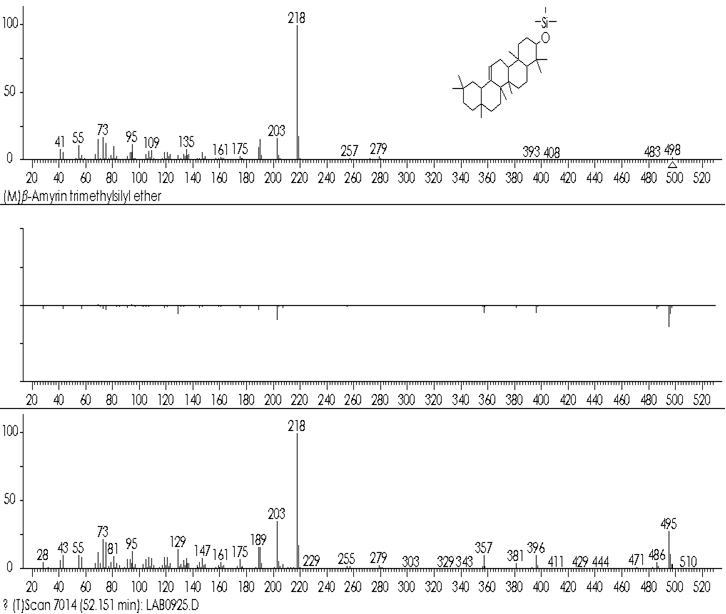


**Figure S21.** Mass spectrum and structure of *β*-amyrin.


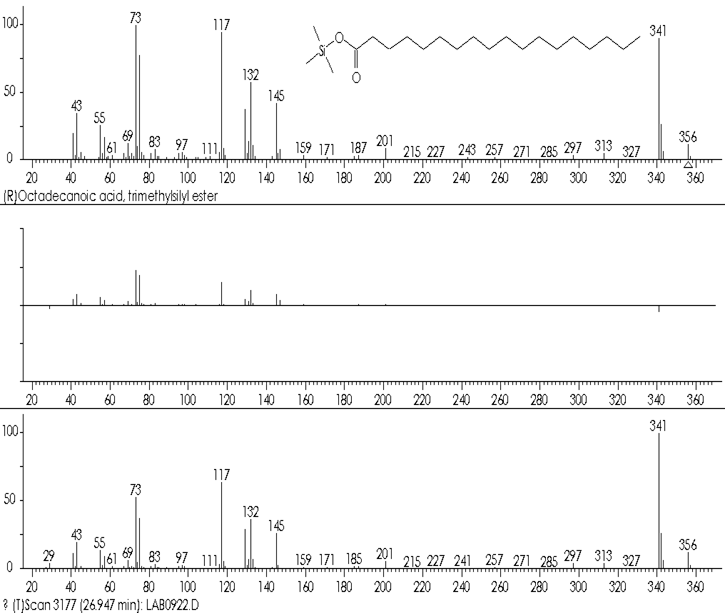


**Figure S22.** Mass spectrum and structure of octadecanoic acid.


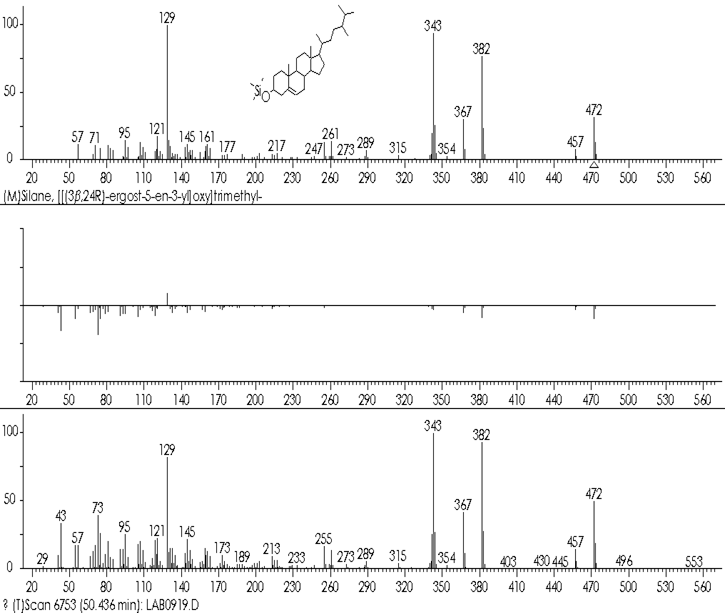


**Figure S23.** Mass spectrum and structure of campesterol.


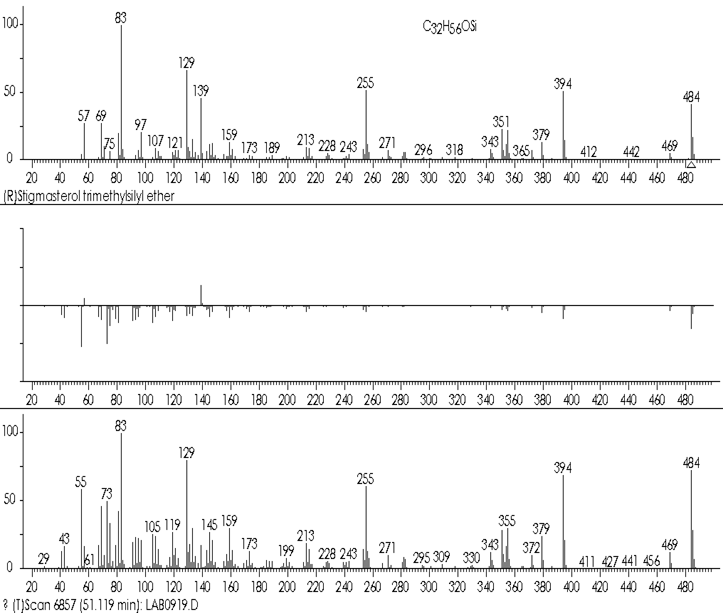


**Figure S24.** Mass spectrum and structure of stigmasterol.


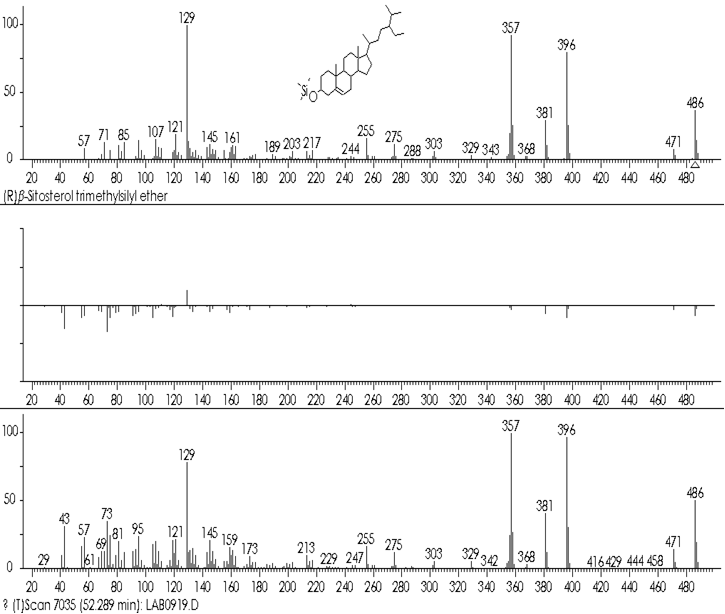


**Figure S25.** Mass spectrum and structure of *β*-sitosterol.


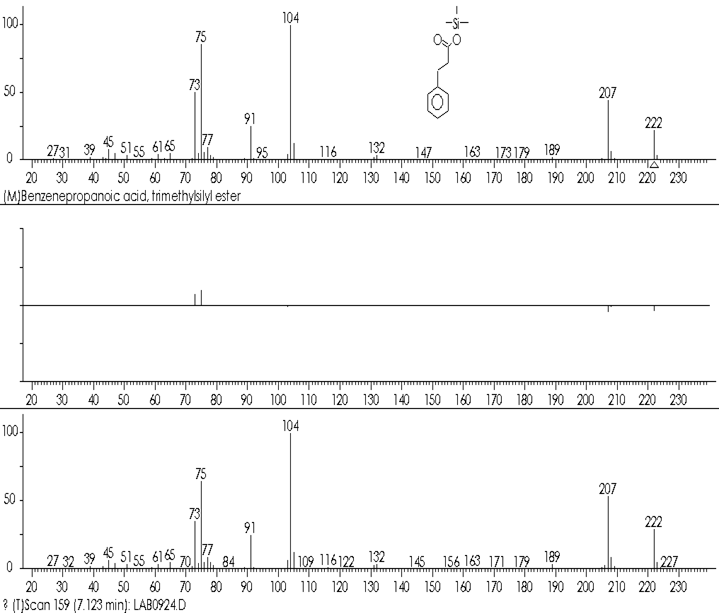


**Figure S26.** Mass spectrum and structure of 3-phenylpropanoic acid (Benzenepropanoic acid).


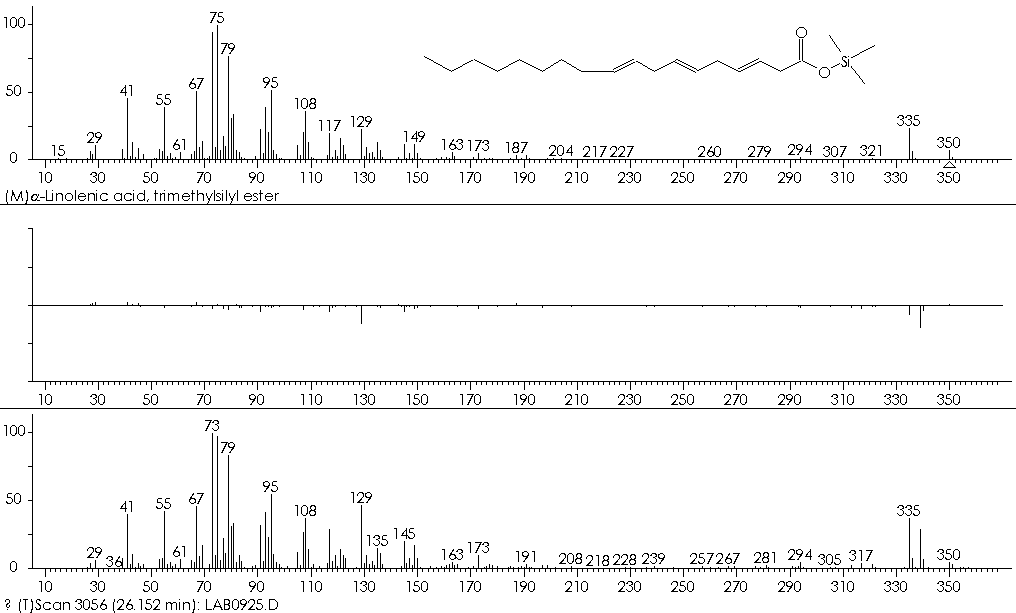


**Figure S27.** Mass spectrum and structure of 9,12,15-octadecatrienoic acid, (Z,Z,Z)-(α-Linolenic acid).


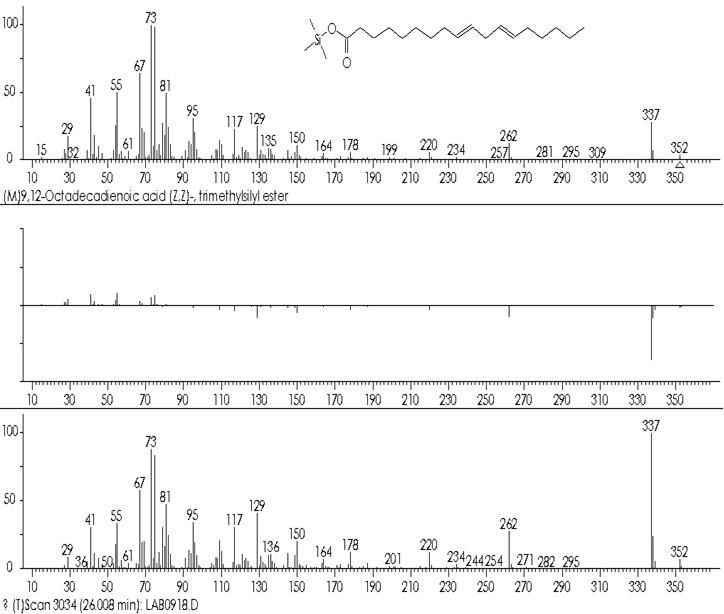


**Figure S28.** Mass spectrum and structure of 9,12-octadecadienoic acid (Z,Z).


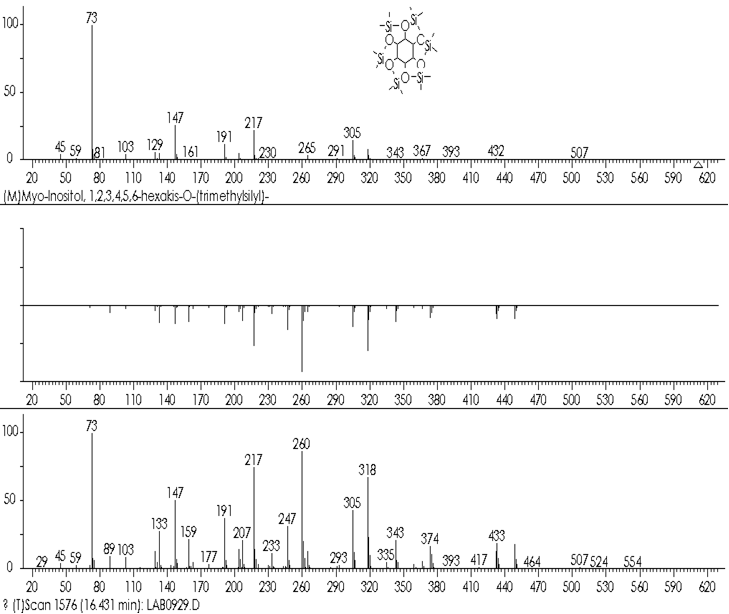


**Figure S29.** Mass spectrum of D-pinitol, compared with [51].
